# Supplementary material
Source: PubMed Central journal article supplement (PMC6509651)
Supplement: JB.00573-18-s0001.pdf [file JB.00573-18-s0001.pdf]

## SUPPLEMENTARY FIGURES AND TABLES

**FIG S1** Menadione sensitivity of the *aeqA* mutant of a reduced-genome *E. coli* strain and wild-type *E. coli*.

**FIG S2** The effect of substitutions of conserved amino acid residues of AegA on urate-degrading activity.

**FIG S3** The effect of various carbon sources on cell growth.

**FIG S4** Taxonomic distribution of AegA and YgfT.

**FIG S5** Comparison of amino acid sequences for AegA/YgfT and a bifurcating enzyme NfnI-L.

**FIG S6** The proposed model of electron flow during FDH-H<sup>-</sup> and AegA<sup>-</sup> or YgfT-dependent uric acid degradation.

**TABLE S1** Distribution of enzymes related to AegA/YgfT-dependent uric acid degradation

**TABLE S2** Strains and plasmids used in the current study

**TABLE S3** Primers used in the current study

**TABLE S4** Primer-template sets used in the current study

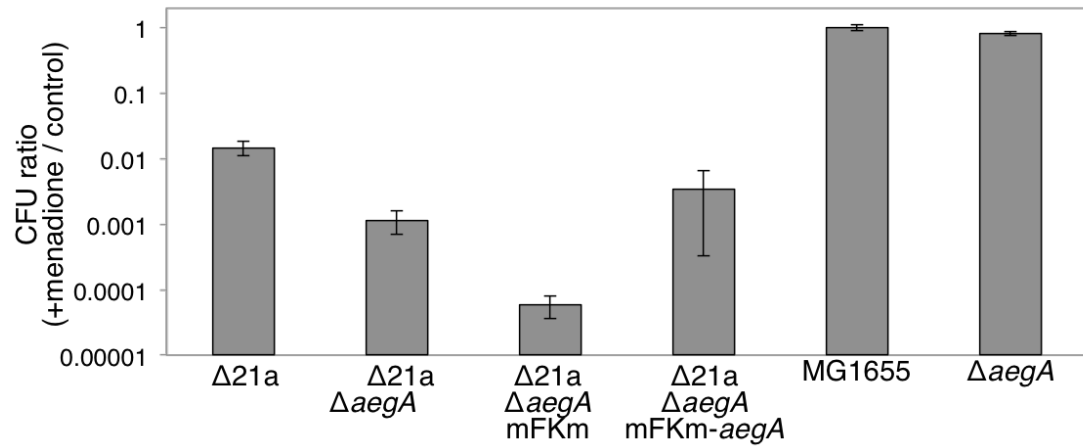

**FIG S1 Menadione sensitivity of the *aegA* mutant of a reduced-genome *E. coli* strain and wild-type *E. coli*.** Menadione sensitivity of strain  $\Delta 21$  (a genome-reduced strain),  $\Delta 21\Delta aegA$  strain, wild-type MG1655 strain, and  $\Delta aegA$  strain was determined.

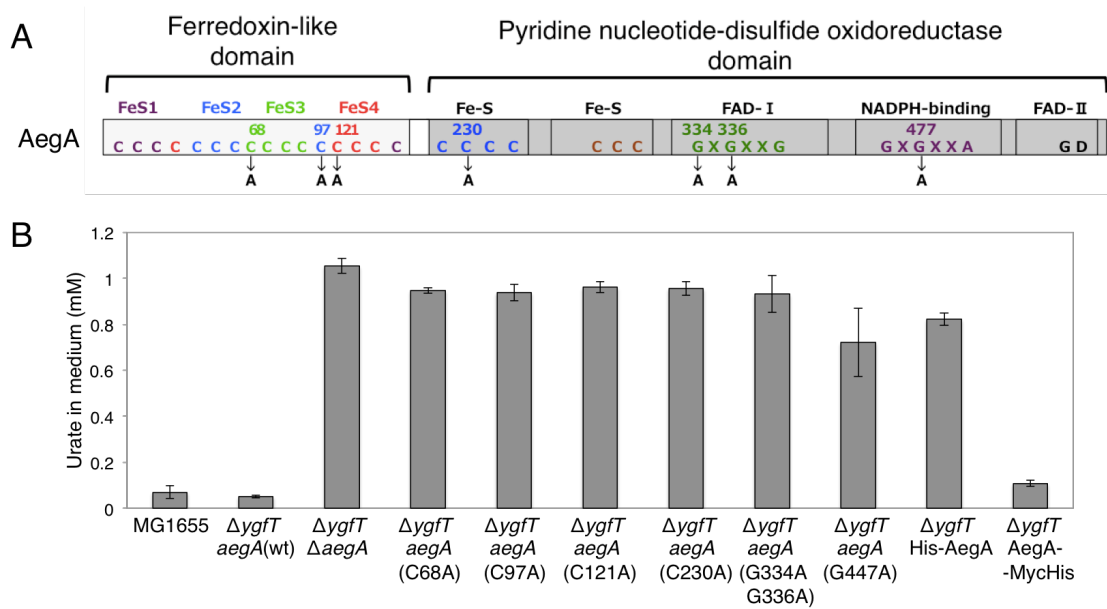

**FIG S2 The effect of substitution of conserved amino acid residues of AegA on urate-degrading activity.** (A) Schematic representation of the conserved amino acids at the Fe-S sites in the N-terminal ferredoxin-like domain, and the Fe-S sites, FAD-binding site, and NADPH-binding site in the C-terminal pyridine nucleotide-disulfide oxidoreductase domain, of AegA. (B) The effect of substitution of C68, C97, C121, C230, G334G336, and G447 to A on the cellular uric acid degradation activity.

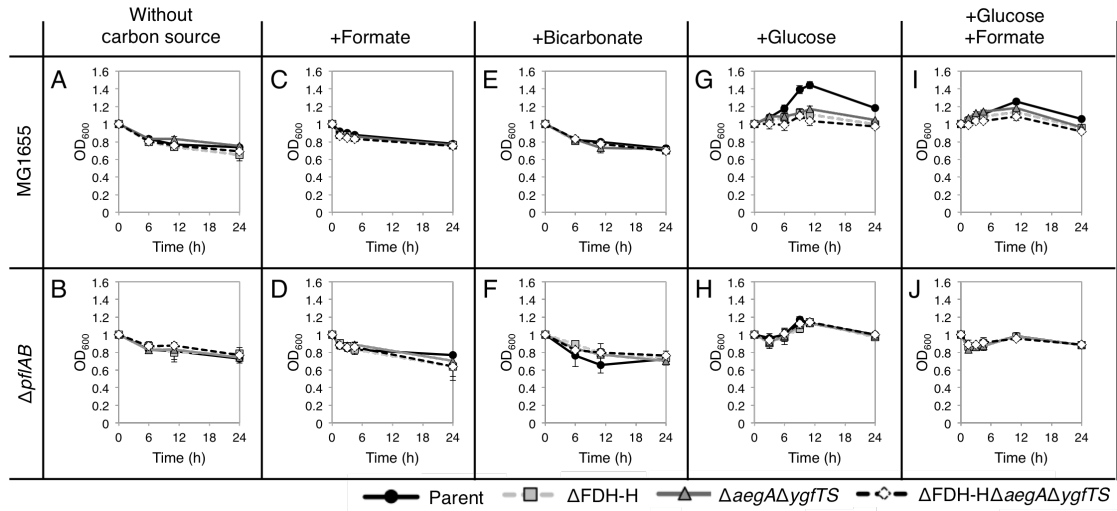

**FIG S3 The effect of various carbon sources on cell growth.** Cell growth in uric acid in unsupplemented minimal medium (without a carbon source) during a 24 h incubation of (A) wild-type derivatives and (B)  $\Delta pflAB$  derivatives. The effect of the supplementation of a minimal medium with formate on the growth on uric acid of wild-type derivatives (C) and  $\Delta pflAB$  derivatives (D) during a 24 h incubation. The effect of the supplementation of a minimal medium with bicarbonate on the growth on uric acid of wild-type derivatives (E) and  $\Delta pflAB$  derivatives (F) during a 24 h incubation. The effect of the supplementation of a minimal medium with glucose on the growth on uric acid of wild-type derivatives (G) and  $\Delta pflAB$  derivatives (H) during a 24 h incubation. The effect of the supplementation of a minimal medium with glucose and formate on the growth on uric acid of wild-type derivatives (I) and  $\Delta pflAB$  derivatives (J) during a 24 h incubation.

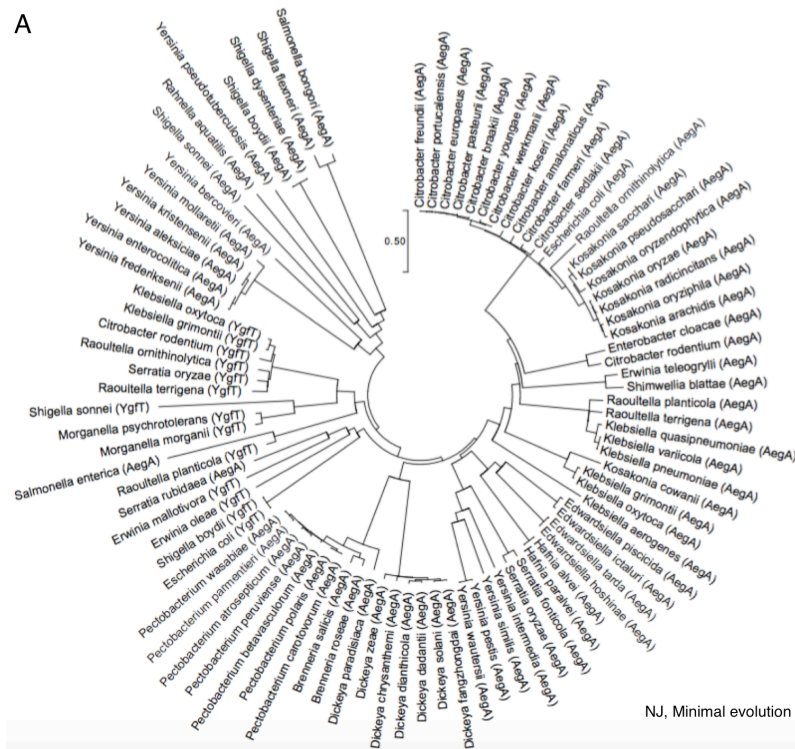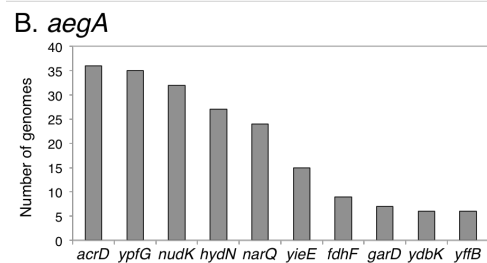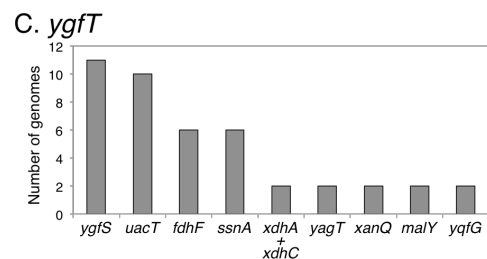

**FIG S4 Taxonomic distribution of AegA and YgfT.** (A) Taxonomic distribution of AegA and YgfT is shown. Network analysis of proteins encoded by the flanking genes ( $\pm 2$  genes) of *aegA* (B) and *ygfT* (C) was performed. Top-10 most frequently found genes are shown.

|         |     |                                                                                    |     |
|---------|-----|------------------------------------------------------------------------------------|-----|
| AegA    | 1   | MNRFIMANSQQCLGCHACEIACVMAHNDEQHVLSQHFFHPRITVIKHQQRSVAVTCHHCEDAPCARSCPNGAISHVDDSI   | 80  |
| YgfT    | 1   | MNKFIAAEAAECIGCHACEIACVAHNQENWPLSHSDFRPRIHVVGKGQAANPVACHHCNNAPCVTACPVNALTQSDSV     | 80  |
| PfNfn1L |     |                                                                                    |     |
| AegA    | 81  | QVNQQKICIGCKSCVVACPFQTMQIVLT [9]TAHKCDLCAGRENGP-ACVENCADALQLVTDVALSGMAKSRRRLRTARQE | 165 |
| YgfT    | 81  | QLDEQKICIGCKRCAIACPFQVVMVDV IAQKCDLCNQRSSGTqACIEVCPQALRLMDDKGLQKIKVARQRKTAAGK      | 157 |
| PfNfn1L |     |                                                                                    |     |
| AegA    | 166 | [5]ASTAAQEmpvMSKVEQMQATPARGEPDKLAIARKTGFEIYLPFRADQAQREASRCLKCG-EHSVCEWTCPLHNHI     | 246 |
| YgfT    | 158 | ASSDAQP----SRSAALLPVNSRKGADKISASERKTHFGIYCGLDPQQATYESDRCVYCA-EKANCNWHCPLHNAI       | 229 |
| PfNfn1L | 1   | -----MPRLIKDRVPTPERSVGERVRDFGEVNLGYSWELALREAERLQCPVEYAPCIKGPVHINI                  | 62  |
| AegA    | 247 | PQWIELVKAGN IDAAVELSHQNTNLTPEITGRVCPQDRLECGACTIRDEHGAVTIGNIERIYISDQALAKG WRPDL     | 320 |
| YgfT    | 238 | PDYIRLVQEGK IIEAAELCHQTSLSPEICGRVCPQDRLECGACTLKDHSQAVSIGNLERIYITDATALAMG WRPDV     | 303 |
| PfNfn1L | 63  | PGFIKALRENR [6]VREALRIWRDNTLPAITGRVCPQEEQCEGACVVGKVGDPINIGKLERFVADYAREHG [5]LLEEI  | 147 |
| AegA    | 321 | SHVTKVDRKVAIIGAGPAGLACADVLRNCGVGVTVYDRHPEIGGLTFGIPSFRLDKSLLARRREIFSAMGIHFELNCEV    | 400 |
| YgfT    | 304 | SKVVPRSEKVAVIGAGPAGLGCADILARAGVQVDVDRHPEIGGLTFGIPPFKLDKTVLSQRREIFTAMGIDFHLNCEI     | 383 |
| PfNfn1L | 148 | KGIKRNGKKVAIIGAGPAGLTCADLAKMGYEVTIYEALHQPGGVLYGLPEFRLPKEIVKKELENLRLGVKTIETNVLV     | 227 |
| AegA    | 481 | MDCVRTALRHGASNVTCAYRRDEANMPGSKKEVKNAREEGANFEFNVQPVALELNEQGHVCGIRFLRTRLGEPDAQGRRR   | 480 |
| YgfT    | 464 | MDCLRTSIRLNAASVTCAYRRDEVSMPGSRKEVKNAREEGVEFQFNVQPQYIACDEGRLTAVGLIRTAMGEPDGRRR      | 463 |
| PfNfn1L | 306 | MDAARSALRLG-AE VWILYRRTRKEMTAREEIKHAEEEGVKFMFLVTPKRFIGDENGLKAIELEKMKLGEDESRRR      | 305 |
| AegA    | 561 | PVPVEGSEFVMPADAVIMAFGFNPHGMPWLESHGVTVDKWGRIIADVESQYRYQTTNPKIFAGGDAVRGADLVVTAMAEG   | 640 |
| YgfT    | 544 | PRPVAGSEFELPADVIMAFGFQAHAMPWLQSGIKLDKWGLIQTGDVGYLPTQTHLKKVFAGGDAVHGADLVVTAMAAG     | 623 |
| PfNfn1L | 385 | PIPT-GETFIMEFDTAI IAIQTPNKTFLETVPLKVDWGRIVVDEN----LMTSIPGVFAGGDAIRGEATVILAMGDG     | 459 |
| AegA    | 641 | RHAAQGIIDWLGKSVKSH                                                                 | 659 |
| YgfT    | 624 | RQAAR--DMLTLFDTKAS                                                                 | 639 |
| PfNfn1L | 468 | RKAAKAIHQYLSKEK----                                                                | 474 |

**FIG S5 Comparison of amino acid sequences for AegA/YgfT and a bifurcating enzyme NfnI-L.** Multiple-sequence alignment was made using *Cobalt* (1). The amino acid residues in red represent identical amino acids, and amino acid residues in blue represent similar amino acids, in the three compared sequences. Important residues close to the FAD-binding site in NfnI-L are boxed.

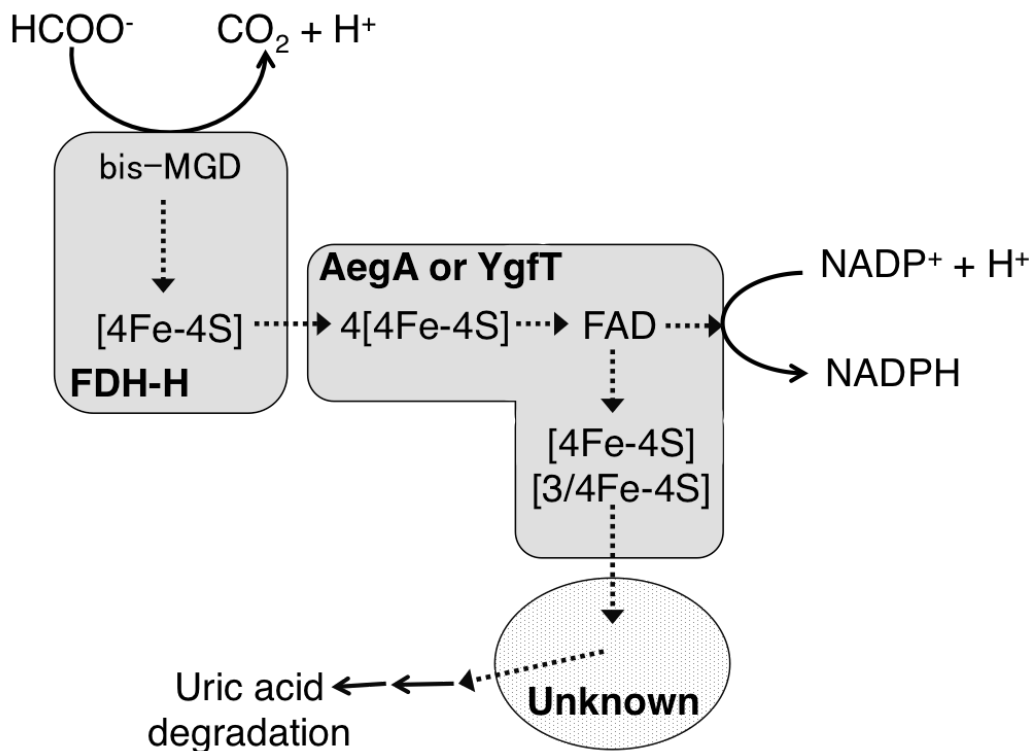

**FIG S6 The proposed model of electron flow during FDH-H- and AegA- or YgfT-dependent uric acid degradation.** The dashed lines represent the electron flow. First, FDH-H obtains electrons from formate through an essential molybdenum cofactor, bis-molybdopterin guanine dinucleotide (Bis-MGD). Then, the electrons are transferred to the N-terminal ferredoxin-like domains of AegA or YgfT via the iron-sulfur cluster of FDH-H, and subsequently the cofactor FAD of AegA or YgfT is reduced. Finally, FADH<sub>2</sub> reduces NADP<sup>+</sup> and the other enzyme at the same (bifurcation) or different (bifunction) time.

**Table S1. Distribution of enzymes related to AegA/YgfT -dependent uric acid degradation.**

| Name                            | AegA<br>P37127.2        | YgfT<br>Q46820.2 | FDH-H<br>P07658.2                                         | UacT<br>Q46821.2        | YgeV<br>Q46802.1        | HpxO<br>A6T923.1        | HpyO<br>Q8PDQ6.1 |
|---------------------------------|-------------------------|------------------|-----------------------------------------------------------|-------------------------|-------------------------|-------------------------|------------------|
| <i>Brenneria roseae</i>         | PWC19994.1<br>(62%)     | -                | PWC18362.1<br>(67%)                                       | -                       | -                       | -                       | -                |
| <i>Brenneria salicis</i>        | WP_113867159.1<br>(62%) | -                | WP_113868509.1<br>(68%)                                   | -                       | WP_113866890.1<br>(59%) | WP_113866833.1<br>(70%) | -                |
| <i>Citrobacter amalonaticus</i> | WP_103775484.1<br>(87%) | -                | WP_103777760.1<br>(97%)<br>WP_103775898.1<br>(65%)        | WP_044327227.1<br>(93%) | WP_042999388.1<br>(89%) | -                       | -                |
| <i>Citrobacter braakii</i>      | WP_047501608.1<br>(87%) | -                | WP_080756030.1<br>(95%)<br>WP_047417935.1<br>(65%)        | -                       | WP_047414829.1<br>(37%) | -                       | -                |
| <i>Citrobacter europaeus</i>    | WP_087052460.1<br>(88%) | -                | WP_080625853.1<br>(95%)<br>WP_087050670.1<br>(65%)        | -                       | -                       | -                       | -                |
| <i>Citrobacter farmeri</i>      | WP_042317641.1<br>(88%) | -                | WP_084196605.1<br>(96%)<br>WP_042319512.1<br>(65%)        | WP_042322141.1<br>(93%) | WP_042322179.1<br>(88%) | -                       | -                |
| <i>Citrobacter freundii</i>     | WP_003838512.1<br>(88%) | -                | WP_080602221.1<br>(95%)<br>WP_003030731.1<br>(65%)        | -                       | WP_003839752.1<br>(38%) | -                       | -                |
| <i>Citrobacter koseri</i>       | WP_024130130.1<br>(86%) | -                | WP_077956844.1<br>(97%)<br>ABV14876.1+ABV14879.1<br>(97%) | -                       | -                       | -                       | -                |



|                                  |                         |                         |                                                    |                         |                         |                         |   |
|----------------------------------|-------------------------|-------------------------|----------------------------------------------------|-------------------------|-------------------------|-------------------------|---|
| <i>Citrobacter pasteurii</i>     | WP_040233503.1<br>(88%) | -                       | WP_082031702.1<br>(95%)<br>WP_040233894.1<br>(65%) | -                       | WP_005122995.1<br>(38%) | -                       | - |
| <i>Citrobacter portucalensis</i> | WP_079935151.1<br>(88%) | -                       | WP_079935032.1<br>(95%)<br>WP_071444730.1<br>(65%) | -                       | WP_079934247.1<br>(38%) | -                       | - |
| <i>Citrobacter rodentium</i>     | WP_012906603.1<br>(87%) | WP_012907456.1<br>(69%) | WP_081442325.1<br>(97%)<br>WP_081442324.1<br>(84%) | WP_012907455.1<br>(42%) | WP_012907467.1<br>(69%) | -                       | - |
| <i>Citrobacter sedlakii</i>      | WP_042290898.1<br>(87%) | -                       | WP_084589031.1<br>(97%)<br>WP_042287609.1<br>(66%) | -                       | -                       | -                       | - |
| <i>Citrobacter werkmanii</i>     | WP_042306888.1<br>(88%) | -                       | WP_079225655.1<br>(95%)<br>WP_042308930.1<br>(65%) | -                       | WP_042313222.1<br>(38%) | -                       | - |
| <i>Citrobacter youngae</i>       | WP_032939493.1<br>(88%) | -                       | WP_084742830.1<br>(95%)<br>WP_006684908.1<br>(66%) | -                       | -                       | -                       | - |
| <i>Dickeya chrysanthemi</i>      | WP_027713628.1<br>(59%) | -                       | WP_027712528.1<br>(68%)                            | -                       | -                       | WP_027713194.1<br>(72%) | - |
| <i>Dickeya dadantii</i>          | WP_013320125.1<br>(59%) | -                       | WP_013317224.1<br>(67%)                            | -                       | -                       | -                       | - |
| <i>Dickeya dianthicola</i>       | WP_024107897.1<br>(59%) | -                       | WP_024105249.1<br>(67%)                            | -                       | -                       | WP_024104447.1<br>(73%) | - |
| <i>Dickeya fangzhongdai</i>      | WP_100850366.1<br>(60%) | -                       | WP_049854965.1<br>(65%)                            | -                       | -                       | WP_100848820.1<br>(72%) | - |
| <i>Dickeya paradisiaca</i>       | WP_015855654.1<br>(60%) | -                       | WP_012764887.1<br>(68%)                            | -                       | -                       | -                       | - |

|                               |                         |                         |                                                                    |                         |                         |                         |   |
|-------------------------------|-------------------------|-------------------------|--------------------------------------------------------------------|-------------------------|-------------------------|-------------------------|---|
| <i>Dickeya solani</i>         | WP_039691991.1<br>(59%) | -                       | WP_038660243.1<br>(67%)                                            | -                       | -                       | WP_039692609.1<br>(72%) | - |
| <i>Dickeya zeae</i>           | WP_019844260.1<br>(59%) | -                       | WP_019844833.1<br>(67%)                                            | -                       | -                       | -                       | - |
| <i>Edwardsiella hoshinae</i>  | WP_024523410.1<br>(65%) | -                       | WP_081702264.1<br>(74%)<br>AOV95968.1<br>(71%)                     | WP_024522335.1<br>(72%) | WP_024523988.1<br>(73%) | -                       | - |
| <i>Edwardsiella ictaluri</i>  | WP_015871248.1<br>(64%) | -                       | WP_015872499.1<br>(73%)                                            | WP_015871730.1<br>(72%) | WP_015872738.1<br>(72%) | -                       | - |
| <i>Edwardsiella piscicida</i> | WP_012848619.1<br>(65%) | -                       | WP_078057759.1<br>(73%)<br>AGH74914.1+AGH74915.1<br>(82%,70%)      | WP_012848998.1<br>(72%) | WP_015462399.1<br>(73%) | -                       | - |
| <i>Edwardsiella tarda</i>     | PVD96283.1<br>(65%)     | -                       | WP_005296397.1<br>(73%)                                            | WP_005296993.1<br>(72%) | WP_005289730.1<br>(72%) | -                       | - |
| <i>Enterobacter cloacae</i>   | WP_013098217.1<br>(78%) | -                       | WP_013095085.1<br>+WP_013095086.1 (95%)<br>WP_013096962.1<br>(65%) | -                       | -                       | WP_013097236.1<br>(81%) | - |
| <i>Erwinia mallotivora</i>    | -                       | WP_034934316.1<br>(63%) | WP_034934312.1<br>(62%)                                            | -                       | WP_084276176.1<br>(54%) | WP_034935945.1<br>(69%) | - |
| <i>Erwinia oleae</i>          | -                       | WP_034945038.1<br>(64%) | WP_034945033.1<br>(61%)                                            | WP_052118369.1<br>(43%) | WP_034945233.1<br>(51%) | WP_034950873.1<br>(27%) | - |
| <i>Erwinia teleogrylli</i>    | WP_058913314.1<br>(74%) | -                       | WP_082683201.1<br>(87%)                                            | -                       | WP_058910632.1<br>(38%) | -                       | - |

|                                   |                         |                         |                                                    |                         |                         |                         |   |
|-----------------------------------|-------------------------|-------------------------|----------------------------------------------------|-------------------------|-------------------------|-------------------------|---|
| <i>Escherichia coli</i>           | P37127.2<br>(100%)      | Q46820.2<br>(100%)      | P07658.2<br>(100%)                                 | Q46821.2<br>(100%)      | Q46802.1<br>(100%)      | -                       | - |
| <i>Hafnia alvei</i>               | WP_004089824.1<br>(65%) | -                       | WP_087944325.1<br>(75%)<br>WP_004093289.1<br>(68%) | WP_004095720.1<br>(70%) | WP_035504355.1<br>(72%) | -                       | - |
| <i>Hafnia paralvei</i>            | WP_008813462.1<br>(65%) | -                       | WP_082019157.1<br>(75%)<br>WP_082919470.1<br>(68%) | WP_039188795.1<br>(70%) | WP_008815430.1<br>(72%) | -                       | - |
| <i>Klebsiella aerogenes</i>       | WP_108684119.1<br>(77%) | -                       | WP_108683964.1<br>(94%)<br>WP_108684333.1<br>(92%) | WP_015366914.1<br>(41%) | WP_015366900.1<br>(75%) | WP_045361186.1<br>(80%) | - |
| <i>Klebsiella grimontii</i>       | WP_098141014.1<br>(79%) | WP_098140839.1<br>(67%) | WP_098140218.1<br>(95%)<br>WP_077253451.1<br>(86%) | WP_004133613.1<br>(43%) | SNU36138.1<br>(73%)     | WP_004871444.1<br>(84%) | - |
| <i>Klebsiella oxytoca</i>         | WP_014230339.1<br>(78%) | WP_014229769.1<br>(67%) | WP_077598877.1<br>(86%)                            | WP_014229771.1<br>(43%) | AEX06366.1<br>(73%)     | WP_014228756.1<br>(84%) | - |
| <i>Klebsiella pneumoniae</i>      | WP_008803840.1<br>(76%) | -                       | WP_012543160.1<br>(95%)<br>WP_012541439.1<br>(66%) | -                       | -                       | WP_008804924.1<br>(99%) | - |
| <i>Klebsiella quasipneumoniae</i> | WP_109547067.1<br>(76%) | -                       | WP_048335933.1<br>(66%)<br>WP_077598907.1<br>(95%) | -                       | -                       | WP_023289663.1<br>(99%) | - |
| <i>Klebsiella variicola</i>       | WP_012967460.1<br>(76%) | -                       | WP_012969145.1<br>(94%)<br>WP_012967957.1<br>(66%) | -                       | -                       | WP_012968247.1<br>(98%) | - |

|                                  |                         |   |                                                                                                                       |   |                     |                         |   |
|----------------------------------|-------------------------|---|-----------------------------------------------------------------------------------------------------------------------|---|---------------------|-------------------------|---|
| <i>Kosakonia arachidis</i>       | WP_090124753.1<br>(80%) | - | WP_090121893.1<br>(94%)<br>SFT92868.1+SFT92859.1<br>(95%, 94%)<br>WP_090120916.1<br>(67%)<br>WP_090125349.1<br>(33%)  | - | -                   | WP_090119467.1<br>(83%) | - |
| <i>Kosakonia cowanii</i>         | APZ07517.1<br>(78%)     | - | APZ04247.1 +APZ04248.1<br>(94%, 92%)<br>APZ04494.1<br>(66%)<br>APZ06820.1<br>(35%)                                    | - | APZ07402.1<br>(71%) | -                       | - |
| <i>Kosakonia oryzae</i>          | WP_064564598.1<br>(82%) | - | WP_064564176.1<br>(66%)<br>WP_082934132.1<br>(94%)                                                                    | - | -                   | WP_064567402.1<br>(83%) | - |
| <i>Kosakonia oryzendophytica</i> | WP_088238185.1<br>(81%) | - | WP_082794188.1<br>(95%)<br>SCC47526.1+SCB85072.1<br>(96% , 94%)<br>WP_061493444.1<br>(67%)<br>WP_088237880.1<br>(34%) | - | -                   | -                       | - |
| <i>Kosakonia oryziphila</i>      | WP_090136254.1<br>(81%) | - | WP_090136680.1<br>(95%)<br>SCC47511.1<br>(94%)<br>WP_090134534.1<br>(66%)<br>WP_090134032.1<br>(34%)                  | - | -                   | WP_090136419.1<br>(82%) | - |

|                                      |                         |                         |                                                                               |                         |                         |                         |                         |
|--------------------------------------|-------------------------|-------------------------|-------------------------------------------------------------------------------|-------------------------|-------------------------|-------------------------|-------------------------|
| <i>Kosakonia pseudosacchari</i>      | WP_097400306.1<br>(82%) | -                       | WP_086873959.1<br>(95%)<br>WP_086873690.1<br>(67%)<br>WP_097399640.1<br>(35%) | -                       | -                       | -                       | -                       |
| <i>Kosakonia radicincitans</i>       | WP_007370887.1<br>(81%) | -                       | WP_007370533.1<br>(66%)<br>WP_007371777.1<br>(33%)<br>WP_079517076.1<br>(95%) | -                       | -                       | WP_007374278.1<br>(83%) | WP_007372550.1<br>(37%) |
| <i>Kosakonia sacchari</i>            | WP_065370391.1<br>(82%) | -                       | WP_065368325.1<br>(34%)<br>WP_083126964.1<br>(95%)<br>WP_017459296.1<br>(67%) | -                       | -                       | -                       | -                       |
| <i>Morganella morganii</i>           | -                       | WP_062772669.1<br>(64%) | WP_062772369.1<br>(64%)                                                       | WP_062773079.1<br>(32%) | WP_049246430.1<br>(64%) | -                       | -                       |
| <i>Morganella psychrotolerans</i>    | -                       | WP_067404336.1<br>(64%) | WP_067404760.1<br>(65%)                                                       | WP_067404325.1<br>(77%) | WP_067424175.1<br>(63%) | -                       | -                       |
| <i>Pectobacterium atrosepticum</i>   | WP_011095917.1<br>(61%) | -                       | WP_011093088.1<br>(66%)<br>WP_011092840.1<br>(64%)                            | -                       | -                       | -                       | -                       |
| <i>Pectobacterium betavasculorum</i> | WP_039307596.1<br>(61%) | -                       | WP_039307451.1<br>(66%)<br>WP_039301898.1<br>(65%)                            | -                       | -                       | WP_039303411.1<br>(73%) | -                       |
| <i>Pectobacterium carotovorum</i>    | PXB00685.1<br>(61%)     | -                       | PXB03217.1<br>(66%)                                                           | -                       | -                       | -                       | -                       |
| <i>Pectobacterium parmentieri</i>    | WP_015731593.1<br>(61%) | -                       | WP_015730221.1<br>(66%)                                                       | -                       | -                       | -                       | -                       |

|                                   |                         |                         |                                                    |                         |                         |                         |   |
|-----------------------------------|-------------------------|-------------------------|----------------------------------------------------|-------------------------|-------------------------|-------------------------|---|
| <i>Pectobacterium peruvienne</i>  | WP_113627154.1<br>(62%) | -                       | WP_113625582.1<br>(66%)<br>WP_113627286.1<br>(65%) | -                       | -                       | -                       | - |
| <i>Pectobacterium polaris</i>     | WP_109412130.1<br>(61%) | -                       | WP_109412017.1<br>(65%)                            | -                       | -                       | -                       | - |
| <i>Pectobacterium wasabiae</i>    | WP_005976634.1<br>(61%) | -                       | WP_005970873.1<br>(66%)                            | -                       | -                       | -                       | - |
| <i>Rahnella aquatilis</i>         | AFE58521.1<br>(57%)     | -                       | WP_015689505.1<br>(68%)                            | -                       | -                       | WP_015690544.1<br>(68%) | - |
| <i>Raoultella ornithinolytica</i> | WP_004866135.1<br>(76%) | WP_004862850.1<br>(69%) | WP_004863070.1<br>(65%)                            | WP_004862857.1<br>(84%) | WP_004862816.1<br>(75%) | WP_004860305.1<br>(81%) | - |
| <i>Raoultella planticola</i>      | WP_032699036.1<br>(77%) | WP_032699623.1<br>(68%) | WP_080718653.1<br>(93%)<br>WP_032699577.1<br>(65%) | WP_050500315.1<br>(84%) | WP_032696016.1<br>(76%) | WP_032700349.1<br>(84%) | - |
| <i>Raoultella terrigena</i>       | WP_045856230.1<br>(77%) | WP_045858654.1<br>(69%) | WP_045858779.1<br>(66%)                            | WP_052698750.1<br>(84%) | WP_045858635.1<br>(75%) | WP_045854751.1<br>(81%) | - |
| <i>Salmonella bongori</i>         | AGR59776.1<br>(84%)     | -                       | AGR61457.1<br>(98%)                                | -                       | -                       | -                       | - |
| <i>Salmonella enterica</i>        | EGE30645.1<br>(84%)     | -                       | EGE32322.1<br>(98%)                                | -                       | -                       | -                       | - |
| <i>Serratia fonticola</i>         | WP_021806731.1<br>(58%) | -                       | WP_021806458.1<br>(73%)                            | ERK10812.1<br>(71%)     | ERK14431.1<br>(69%)     | -                       | - |
| <i>Serratia oryzae</i>            | WP_083704380.1<br>(58%) | WP_076941014.1<br>(61%) | WP_083704367.1<br>(89%)<br>WP_076941254.1<br>(65%) | WP_076941013.1<br>(82%) | WP_076942367.1<br>(67%) | -                       | - |
| <i>Serratia rubidaea</i>          | WP_061325023.1<br>(60%) | -                       | WP_061325026.1<br>(65%)                            | AML60097.1<br>(44%)     | AML60107.1<br>(62%)     | WP_061324419.1<br>(82%) | - |
| <i>Shigella boydii</i>            | EFW55379.1<br>(99%)     | EFW57118.1<br>(99%)     | WP_001300547.1<br>(100%)                           | WP_024183589.1<br>(99%) | -                       | -                       | - |

|                                |                         |                     |                                                                           |                     |                     |   |   |
|--------------------------------|-------------------------|---------------------|---------------------------------------------------------------------------|---------------------|---------------------|---|---|
| <i>Shigella dysenteriae</i>    | EFW51348.1<br>(99%)     | -                   | EFW49573.1<br>(99%)                                                       | EFW51004.1<br>(99%) | -                   | - | - |
| <i>Shigella flexneri</i>       | EGJ85869.1<br>(99%)     | -                   | EGJ82573.1<br>+EGJ82575.1<br>(99%)                                        | EGJ84101.1<br>(99%) | -                   | - | - |
| <i>Shigella sonnei</i>         | EIQ52090.1<br>(99%)     | EIQ51256.1<br>(99%) | EIQ49720.1<br>+ EIQ49730.1<br>(99%, 100%)                                 | EIQ51239.1<br>(99%) | EIQ51238.1<br>(99%) | - | - |
| <i>Shimwellia blattae</i>      | WP_002441264.1<br>(72%) | -                   | WP_002441512.1<br>(92%)<br>AFJ48682.1<br>(90%)<br>WP_002442990.1<br>(51%) | -                   | -                   | - | - |
| <i>Yersinia aleksiciae</i>     | WP_048618975.1<br>(56%) | -                   | WP_048618975.1<br>(56%)                                                   | -                   | -                   | - | - |
| <i>Yersinia bercovieri</i>     | WP_005275836.1<br>(55%) | -                   | WP_005273825.1<br>(66%)                                                   | -                   | -                   | - | - |
| <i>Yersinia enterocolitica</i> | WP_050142752.1<br>(56%) | -                   | WP_050142756.1<br>(67%)                                                   | -                   | -                   | - | - |
| <i>Yersinia frederiksenii</i>  | WP_038636999.1<br>(56%) | -                   | WP_038634346.1<br>(67%)<br>WP_038636995.1<br>(63%)                        | -                   | -                   | - | - |
| <i>Yersinia intermedia</i>     | WP_005187388.1<br>(57%) | -                   | EEQ18742.1<br>(67%)<br>EEQ18873.1<br>+EEQ18874.1<br>(62%)                 | -                   | -                   | - | - |
| <i>Yersinia kristensenii</i>   | WP_050124898.1<br>(56%) | -                   | WP_050127144.1<br>(66%)                                                   | -                   | -                   | - | - |

|                                    |                         |   |                                                    |   |   |   |   |
|------------------------------------|-------------------------|---|----------------------------------------------------|---|---|---|---|
| <i>Yersinia mollaretii</i>         | WP_004873957.1<br>(56%) | - | WP_004876281.1<br>(67%)<br>WP_032813278.1<br>(63%) | - | - | - | - |
| <i>Yersinia pestis</i>             | WP_002209118.1<br>(56%) | - | WP_002209120.1<br>(63%)                            | - | - | - | - |
| <i>Yersinia pseudotuberculosis</i> | WP_071990600.1<br>(57%) | - | WP_011191608.1<br>(63%)                            | - | - | - | - |
| <i>Yersinia similis</i>            | WP_054878385.1<br>(55%) | - | WP_025382348.1<br>(63%)                            | - | - | - | - |
| <i>Yersinia wautersii</i>          | WP_033848955.1<br>(56%) | - | WP_033848953.1<br>(63%)                            | - | - | - | - |



**TABLE S2 Strains and plasmids used in the current study**

| Strain or plasmid                                 | Genotype or source                                                                                                           |
|---------------------------------------------------|------------------------------------------------------------------------------------------------------------------------------|
| <i>E. coli</i> strain                             |                                                                                                                              |
| <i>aegA'</i> - <i>lacZ</i>                        | ins:Cm <sup>r</sup> ~[ <i>aegA'</i> - <i>lacZ'</i> ]                                                                         |
| <i>ygfT'</i> - <i>lacZ</i>                        | ins:Cm <sup>r</sup> ~[ <i>ygfT'</i> - <i>lacZ'</i> ]                                                                         |
| MG1655                                            | wild-type K-12 MG1655                                                                                                        |
| $\Delta aegA$                                     | $\Delta aegA::Sm^r$                                                                                                          |
| $\Delta ygfTS$                                    | $\Delta ygfTS::Cm^r$                                                                                                         |
| $\Delta aegA\Delta ygfTS$                         | $\Delta aegA::Sm^r \Delta ygfTS::Cm^r$                                                                                       |
| MG1655 mFKm                                       | MG1655 mFKm                                                                                                                  |
| $\Delta aegA\Delta ygfTS$ mFKm <i>aegA</i>        | $\Delta aegA::Sm^r \Delta ygfTS::Cm^r$ mFKm <i>aegA</i>                                                                      |
| $\Delta aegA\Delta ygfTS$ mFKm <i>ygfT</i>        | $\Delta aegA::Sm^r \Delta ygfTS::Cm^r$ mFKm <i>ygfT</i>                                                                      |
| $\Delta hydN\Delta ygfS$                          | $\Delta hydN::Tc^r \Delta ygfS::Cm^r$                                                                                        |
| $\Delta hydN\Delta ygfS\Delta aegA$               | $\Delta hydN::Tc^r \Delta ygfS::Cm^r \Delta aegA::Sm^r$                                                                      |
| $\Delta hydN\Delta ygfTS$                         | $\Delta hydN::Tc^r \Delta ygfTS::Cm^r$                                                                                       |
| $\Delta hydN\Delta ygfTS\Delta aegA$              | $\Delta hydN::Tc^r \Delta ygfTS::Cm^r \Delta aegA::Sm^r$                                                                     |
| $\Delta HYD$                                      | $\Delta hyaA-C::Ap^r \Delta hybC-O::Gen^r \Delta hycB-G::Tc^r$<br>$\Delta hyfA-l::Ap^r$                                      |
| $\Delta HYD\Delta aegA$                           | $\Delta hyaA-C::Ap^r \Delta hybC-O::Gen^r \Delta hycB-G::Tc^r$<br>$\Delta hyfA-l::Ap^r \Delta aegA::Sm^r$                    |
| $\Delta HYD\Delta ygfTS$                          | $\Delta hyaA-C::Ap^r \Delta hybC-O::Gen^r \Delta hycB-G::Tc^r$<br>$\Delta hyfA-l::Ap^r \Delta ygfTS::Cm^r$                   |
| $\Delta HYD\Delta aegA\Delta ygfTS$               | $\Delta hyaA-C::Ap^r \Delta hybC-O::Gen^r \Delta hycB-G::Tc^r$<br>$\Delta hyfA-l::Ap^r \Delta aegA::Sm^r \Delta ygfTS::Cm^r$ |
| $\Delta FDH$                                      | $\Delta fdhF::Ap^r \Delta fdnGHI::Km^r \Delta fdoGHI::Tc^r$                                                                  |
| $\Delta FDH\Delta aegA$                           | $\Delta fdhF::Ap^r \Delta fdnGHI::Km^r \Delta fdoGHI::Tc^r \Delta aegA::Sm^r$                                                |
| $\Delta FDH\Delta ygfTS$                          | $\Delta fdhF::Ap^r \Delta fdnGHI::Km^r \Delta fdoGHI::Tc^r \Delta ygfTS::Cm^r$                                               |
| $\Delta FDH\Delta aegA\Delta ygfTS$               | $\Delta fdhF::Ap^r \Delta fdnGHI::Km^r \Delta fdoGHI::Tc^r \Delta aegA::Sm^r$<br>$\Delta ygfTS::Cm^r$                        |
| $\Delta fdhD$                                     | $\Delta fdhD::Tc^r$                                                                                                          |
| $\Delta FDH-H$                                    | $\Delta fdhF::Ap^r$                                                                                                          |
| $\Delta FDH-N$                                    | $\Delta fdnGHI::Km^r$                                                                                                        |
| $\Delta FDH-O$                                    | $\Delta fdoGHI::Tc^r$                                                                                                        |
| $\Delta FDH-H\Delta FDH-N$                        | $\Delta fdhF::Ap^r \Delta fdnGHI::Km^r$                                                                                      |
| $\Delta FDH-N\Delta FDH-O$                        | $\Delta fdnGHI::Km^r \Delta fdoGHI::Tc^r$                                                                                    |
| $\Delta FDH-O\Delta FDH-H$                        | $\Delta fdoGHI::Tc^r \Delta fdhF::Ap^r$                                                                                      |
| $\Delta FDH-H\Delta FDH-N\Delta FDH-O$            | $\Delta fdhF::Ap^r \Delta fdnGHI::Km^r \Delta fdoGHI::Tc^r$                                                                  |
| MG1655 mFTc                                       | MG1655 mFTc                                                                                                                  |
| $\Delta FDH-H$ mFTc                               | $\Delta fdhF::Ap^r$ mFTc                                                                                                     |
| $\Delta FDH-H$ mFTc FDH-H                         | $\Delta fdhF::Ap^r$ mFTc FDH-H                                                                                               |
| $\Delta FDH-H\Delta aegA\Delta ygfTS$             | $\Delta fdhF::Ap^r \Delta aegA::Sm^r \Delta ygfTS::Cm^r$                                                                     |
| $\Delta pflAB$                                    | $\Delta pflAB::Tc^r$                                                                                                         |
| $\Delta pflAB\Delta FDH-H$                        | $\Delta pflAB::Tc^r \Delta fdhF::Ap^r$                                                                                       |
| $\Delta pflAB\Delta aegA\Delta ygfTS$             | $\Delta pflAB::Tc^r \Delta aegA::Sm^r \Delta ygfTS::Cm^r$                                                                    |
| $\Delta pflAB\Delta FDH-H\Delta aegA\Delta ygfTS$ | $\Delta pflAB::Tc^r \Delta fdhF::Ap^r \Delta aegA::Sm^r \Delta ygfTS::Cm^r$                                                  |
| OCL42                                             | (2)                                                                                                                          |
| OCL43                                             | (2)                                                                                                                          |
| $\Delta ygeV$                                     | $\Delta ygeV::Cm^r$                                                                                                          |
| OCL42 $\Delta pflAB$                              | OCL42 $\Delta pflAB::Tc^r$                                                                                                   |
| OCL43 $\Delta pflAB$                              | OCL43 $\Delta pflAB::Tc^r$                                                                                                   |
| OCL43 <i>ygfT'</i> - <i>lacZ</i>                  | OCL43 ins:Cm <sup>r</sup> ~[ <i>ygfT'</i> - <i>lacZ'</i> ]                                                                   |
| $\Delta ygeV$ <i>ygfT'</i> - <i>lacZ</i>          | $\Delta ygeV::Ap^r$ ins:Cm <sup>r</sup> ~[ <i>ygfT'</i> - <i>lacZ'</i> ]                                                     |
| $\Delta 21a$                                      | (3)                                                                                                                          |
| $\Delta 21a\Delta aegA$                           | $\Delta 21a \Delta aegA::Cm^r$                                                                                               |

|                                          |                                                           |
|------------------------------------------|-----------------------------------------------------------|
| $\Delta 21a\Delta aegA$ mFKm             | $\Delta 21a \Delta aegA::Cm^r$ mFKm                       |
| $\Delta 21a\Delta aegA$ mFKm <i>aegA</i> | $\Delta 21a \Delta aegA::Cm^r$ mFKm <i>aegA</i>           |
| $\Delta ygfT$ <i>aegA</i> (Wt)           | $\Delta ygfT::Km^r$ ins: <i>aegA</i> (Wt)~ $Cm^r$         |
| $\Delta ygfT$ <i>aegA</i> (C68A)         | $\Delta ygfT::Km^r$ ins: <i>aegA</i> (C68A)~ $Cm^r$       |
| $\Delta ygfT$ <i>aegA</i> (C97A)         | $\Delta ygfT::Km^r$ ins: <i>aegA</i> (C97A)~ $Cm^r$       |
| $\Delta ygfT$ <i>aegA</i> (C121A)        | $\Delta ygfT::Km^r$ ins: <i>aegA</i> (C121A)~ $Cm^r$      |
| $\Delta ygfT$ <i>aegA</i> (C230A)        | $\Delta ygfT::Km^r$ ins: <i>aegA</i> (C230A)~ $Cm^r$      |
| $\Delta ygfT$ <i>aegA</i> (G334A G336A)  | $\Delta ygfT::Km^r$ ins: <i>aegA</i> (G334A G336)~ $Cm^r$ |
| $\Delta ygfT$ <i>aegA</i> (G447A)        | $\Delta ygfT::Km^r$ ins: <i>aegA</i> (G447A)~ $Cm^r$      |
| $\Delta ygfT$ His- <i>AegA</i>           | $\Delta ygfT::Km^r$ ins:His- <i>aegA</i> ~ $Cm^r$         |
| $\Delta ygfT$ <i>AegA</i> -His           | $\Delta ygfT::Km^r$ ins: <i>aegA</i> -His~ $Cm^r$         |
| $\Delta ygfT\Delta aegA$                 | $\Delta ygfT::Km^r \Delta aegA::Cm^r$                     |
| Plasmid                                  |                                                           |
| mFKm                                     | $Km^r$                                                    |
| mFKm <i>aegA</i>                         | mFKm containing <i>aegA</i>                               |
| mFKm <i>ygfTS</i>                        | mFKm containing <i>ygfTS</i>                              |
| mFTc                                     | $Tc^r$                                                    |
| mFTc FDH-H                               | mFTc containing <i>fdhF</i>                               |

**TABLE S3 Primers used in the current study**

| Primer     | Sequence (5'-3')                                                    |
|------------|---------------------------------------------------------------------|
| 142-3      | CCTCAGACTCGGACAAAATGTCGTTGCGC                                       |
| Cm N       | CTGGTGTCCCTGTTGATACC                                                |
| Cm C       | CACTTATTCAGGCGTAGCAC                                                |
| 141-24     | ATGACCATGATTACGGATTTC                                               |
| 141-25     | TTCACCACCGCACGATAGAG                                                |
| 141-22     | CGATCGGCATAACCACCACG                                                |
| 141-21     | ATCAAAACATGCCCGAATGTGCACC                                           |
| 141-18     | AAACTGTTACCCGTAGGTAGTCACG                                           |
| 333-22     | TTGTAAAACGACGGCCAGTGAATCCGTAATCATGGTCATAACGACCTTCTTTTT<br>GGTTG     |
| 333-23     | AAGTTGGCCAGGGCTTCCCGGTATCAACAGGGACACCAGGCAGCATTTCGCGT<br>TCAGCG     |
| 372-15-2   | GGTATCAACAGGGACACCAGCACCGGCAGGCGGATCCCCA                            |
| 372-16     | GAATCCGTAATCATGGTCATTTGCATCCCTTTCATTTAATGAG                         |
| aegA-CmN   | AAGGTTTTACAACCAAAAAGAAGGTCGTTATGAATCGT<br>CTGGTGTCCCTGTTGATACC      |
| aegA-CmC   | CGCTGTGAAGTCGGGTTTGTCTGCGCAGGCTATCAGTGAG<br>CACTTATTCAGGCGTAGCAC    |
| CmN'-SaApL | TCCCAATGGCATCGTAAAGAACATTTGAGGCATTTACAGTAATAACTTAGCCATT<br>TCAACACC |
| CmC'-SaApR | TGAAAACGGGGCGAAGAAGTTGTCCATATTGGCCACGTTATAAATCTCGAAAA<br>TAATAGAGGG |
| ygfT-CmN   | AGACATAACTCATTAAATGAAAGGGATGCAAATGAATAAGCTGGTGTCCCTGTTG<br>ATACC    |
| ygfS-CmC   | AGATTCTCCGCGCCTTTCAGCGCGGAGATTTCTTTCAGAGCACTTATTCAGGCG<br>TAGCAC    |
| 333-42     | GAGTCAATTCAGGGTGGTGAATGTGAAACCAGTAACGTTAGTGGAAGAATCGA<br>CAGCAG     |
| 333-46     | CTTGTGCAATGTAACATCAGAGATTTTGAGACACAACGTG<br>GAGGGTGATTTGTTGCGTCA    |
| 333-45     | ACGCTCAGTGGAACGAAAACACGTTAAGGGATTCAATCACACGCGTCTTCTC<br>C           |
| 372-18     | CTTGTGCAATGTAACATCAGAGATTTTGAGACACAACGTG<br>GATTCTCCGCGCCTTTCAGC    |
| 372-19     | CCGAATTC GCTTTCCTGGTGATAATATGCGGTC                                  |
| 372-17     | ACGCTCAGTGGAACGAAAACACGTTAAGGGATTGTCTAAACACATGCTCGTG<br>G           |
| CmN-KmC    | CTGGTGTCCCTGTTGATACCGGGAAGCCCTGGGCCAATTC<br>AAGTCAGCGTAATGCTCTG     |
| hydN-CmN   | CGGCGCATTAACTGTCATTGCTGGAGAATTTGATGAACCGCTGGTGTCCCTGTT<br>GATACC    |
| hydN-CmC   | CTTTGATGCCAGAACAGTTCTGTAAGATTTTAGAACATCCACTTATTCAGGCGT<br>AGCAC     |
| ygfS-CmN   | TGTTAACTCTGTTTATACGAAGGCATCGTGATGAAATCGCTGGTGTCCCTGTTG<br>ATACC     |
| hyaA-SaApL | GTGTGCAAGGAGGAGAGACGTGCGATATGAATAACGAATAACTTAGCCATTTT<br>AACACC     |
| hyaC-SaApR | GCCCCATGACCACCACGCGTTGCTCGCTCATGAACGATAAATCTCGAAAATAAT<br>AGAGGG    |
| hybO-SaApL | CAGGTCTTCGCAACGGAATAACTATAAATGACTGGAGAATAACTTAGCCATTTCA<br>ACACC    |
| hybC-SaApR | TGCCGACCCCTAAGACTAAAATACGCATTACAGAACATAAATCTCGAAAATAATA<br>GAGGG    |
| hycG-CmC   | CGGCTCAGTTGACTGAACACCACCTTTTCACTCATCGGATCACTTATTCAGGCGT<br>AGCAC    |

|            |                                                                   |
|------------|-------------------------------------------------------------------|
| hycB-CmN   | TCAAAAATGACAATCACCTGAGGAATGCCTGGTGAATCGTCTGGTGTCCCTGTT<br>GATACC  |
| hyfA-SaApL | TGTTTCATATCATTTTCAAGGAGCCGACATGAACCGCAATAACTTAGCCATTTCA<br>ACACC  |
| hyfI-SaApR | GTCCAGAAAACAATTTCCCCGCACTCTTCAGTCATGATAAATCTCGAAAATAATA<br>GAGGG  |
| fdhF-TcN   | TGCGTGATTTGATTAAGTGGAGCGAGACCGATGAAAAAAGCCGACCTCATTAAG<br>CAGCTC  |
| fdhF-TcC   | CCTCCGAAAGGAGGCTGTAGAAAGGACGGTATTACGCCAGGGCTGGTTTATGC<br>ATATCGC  |
| fdhE-TcC   | GGCGACCTGCGCCACCCGGAAAAACGTCAGAGATTACTCTCGGCTGGTTTATGCA<br>TATCGC |
| fdoG-TcN   | GACGTGACAATGTCGAAACAAGGAGCAATCCATGCAGGTCCCGACCTCATTAAG<br>CAGCTC  |
| fdnG-CmN   | GCAGTAATACCCCTGAAAAAAGAGGAAAGCAATGGACGTCCTGGTGTCCCTGTT<br>GATACC  |
| fdnI-CmC   | GCTTAAAGTTCAAAGAGATTATATCCCTTCTTCACTCTCCACTTATTCAGGCGTA<br>GCAC   |
| fdhD-TcN   | GACTTATTTTAATTAATTGCTCAAACGCTGCGGATGGGTACCGACCTCATTAAGC<br>AGCTC  |
| fdhD-TcC   | CATAATGTTGGTGTGTGTGTTCTTATCTGGTTAAGAGAAAGGCTGGTTTATGCAT<br>ATCGC  |
| TcN        | CCGACCTCATTAAGCAGCTC                                              |
| TcC        | GGCTGGTTTATGCATATCGC                                              |
| 481-7-2    | TTGCTTGTGGATAGTCCAGACTGAC                                         |
| 481-8      | TTTTTCGCATGTATTGCGATATGCATAAACCCAGCCACAAACTCACGATGTGATTG<br>ATTAC |
| pflA-CmN   | ATGTTCTAATTTCCCCGTAAAGCGGCAACTTTATTGAGTTCTGGTGTCCCTGTTG<br>ATACC  |
| pflB-CmC   | CTCGGACATGTAACACCTACCTTCTTAAGTGGATTTTTTACACTTATTCAGGCGT<br>AGCAC  |
| CmN-TcN    | CTGGTGTCCCTGTTGATACCGGGAAGCCCTGGGCCAACTCCGACCTCATTAAG<br>CAGCTC   |
| CmC-TcC    | CACTTATTCAGGCGTAGCACCAGGCGTTTAAGGGCACCAAGGCTGGTTTATGCA<br>TATCGC  |
| ygeVN-CmN  | GACTTTTAAGTAAGTCTGGAAGGTAAGCTATGGAGCTTGCTGGTGTCCCTGTT<br>GATACC   |
| ygeVC-CmC  | ATCCGGCCTGAATTCAGGCCGATTCACTGAGGTTATGTGCACCTATTCAGGCG<br>TAGCAC   |
| yglT-CmC   | GTCAGCCGGATTAACGATAATTAACGATTTTCATCACGATGCACTTATTCAGGCGT<br>AGCAC |
| 333-28-2   | TTGCGCCATTAGGGGCGCTACGGGCGCAGGGCGCATCTTC                          |
| 333-29     | CCCTGCGCCCGTAGCGCCCCTAATGGCGCAATCAGCCACGTTG                       |
| 333-30     | TGCATCGTACCAAAGGCGCGGCCACCACGCAGGATTTAC                           |
| 333-31     | ATCCTGCGTGGTGGCCGCGCCTTTTGGTACGATGCAAATC                          |
| 333-32     | CCCCGCACAAAGGTCCGCTTTATGCGCCGTGGCTTTTACTTTTCC                     |
| 333-33     | AGTAAAAGCCACGGCGCATAAAGCGGACCTTTGTGCGGGGCGCGA                     |
| 333-34     | AAACGCTGTGCTCGCCCGCCTTAAGGCAGCGCGAGGCTTC                          |
| 333-35     | CGCGCTGCCTTAAGGCGGGCGAGCACAGCGTTTTGTGAATG                         |
| 333-36     | GCCAGCCCTGCCGGGGCTGCGGCGATAATCGCCACCCGCTTGT                       |
| 333-37     | TGGCGATTATCGCCGAGCCCCGGCAGGGCTGGCCTGTGC                           |
| 333-38     | TCCATCGCGGTGTGCGCGCCGCCAGTACCACGACGTTAAG                          |
| 333-39     | GTCGTGGTACTGGGCGGCGCCGACACCGCGATGGACTGTGT                         |
| 333-40     | TGGCCAGGGCTTCCCGGTATCAACAGGGACACCAGTCAGTGAGATTTGACTGA<br>TTTTAC   |
| 333-41     | GTAACCGTCTCTTGCATTG                                               |
| 333-8      | GGCTCAGGGTCATCACCAGTCCATT                                         |
| 333-11     | CTCAATACGTAAAACGGCATCGGTA                                         |

|            |                                                                    |
|------------|--------------------------------------------------------------------|
| 333-16     | GGAAACAATGCACATCAATCTGGCT                                          |
| 333-5      | CCGGATCCAATCACACGCGTCTTCTCC                                        |
| 333-7      | GCCATGTCACCAAAGTGGACAAGCG                                          |
| 333-8      | GGCTCAGGGTCATCACCAGTCCATT                                          |
| 333-9      | TTCGAATTCCCATATGGTACCAGCTGCAGATCTCGGTGAGATTTGACTGATTTA<br>CCCCC    |
| 333-10     | GCCCTTAAACGCCTGGTGCTACGCCTGAATAAGTGTAGCCTGCGCAGACAAACC<br>CGACTT   |
| pBAD-N (T) | CGAGATCTGCAGCTGGTACC                                               |
| pBAD-N5    | CCCTCGAGATCTGCAGCTGGTACCATATGGG                                    |
| pBAD-HisC  | GCTAGCCATACCATGATGATGATGA                                          |
| 333-17     | GTTCTCATCATCATCATCATGGTATGGCTAGCATGAATCGTTTTATTATGGC<br>CAACA      |
| 333-13     | CCCTGCAGTCAGTGAGATTTGACTGATT                                       |
| 333-15     | ATACCATGATGATGATGATGATGATGAGAACCCCCCATAACGACCTTCTTTTTGGTT<br>GTAAA |
| 333-14     | GGCCCAGGGCTTCCCGGTATCAACAGGGACACCAGTCAGTGAGATTTGACTGAT<br>TTTACC   |
| pBAD-HisN  | ATGGGGGGTTCTCATCATCATCATC                                          |
| 334-15     | CCAAGCTTTGGTTGGGATGTTGTGCGACAAAAC                                  |
| 333-16     | GGAAACAATGCACATCAATCTGGCT                                          |

**TABLE S4 Primer-template sets used in the current study**

| No. | Product                           | Primer 1   | Primer 2   | Template 1          | Template 2          | Template 3 |
|-----|-----------------------------------|------------|------------|---------------------|---------------------|------------|
| 1   | lacIN                             | 142-3      | 141-78     | Chromosome          | -                   | -          |
| 2   | Cm                                | Cm N       | Cm C       | pACYC184            | -                   | -          |
| 3   | LacZ                              | 141-24     | 141-25     | Chromosome          | -                   | -          |
| 4   | PaegA                             | 333-23     | 333-22     | Chromosome          | -                   | -          |
| 5   | PygfT                             | 372-15-2   | 372-16     | Chromosome          | -                   | -          |
| 6   | LacIN-Cm                          | 141-23     | Cm N       | lacIN               | Cm                  | -          |
| 7   | Cm-PaegA                          | Cm C       | 333-22     | Cm                  | PaegA               | -          |
| 8   | Cm-PygfT                          | Cm C       | 372-16     | Cm                  | PygfT               | -          |
| 9   | PaegA-lacZ                        | 333-23     | 141-22     | PaegA               | LacZ                | -          |
| 10  | PygfT-lacZ                        | 372-15-2   | 141-22     | PygfT               | LacZ                | -          |
| 11  | <b>lacIN-Cm-PaegA-LacZ</b>        | 141-21     | 141-18     | LacIN-Cm            | Cm-PaegA            | PaegA-lacZ |
| 12  | <b>lacIN-Cm-PygfT-LacZ</b>        | 141-21     | 141-18     | LacIN-Cm            | Cm-PygfT            | PygfT-lacZ |
| 13  | Cm:Sm                             | CmN'-SaApL | CmC'-SaApR | Ap:Sm               | -                   | -          |
| 14  | <b>aegA:Sm</b>                    | aegA-CmN   | aegA-CmC   | Cm:Sm               | -                   | -          |
| 15  | <b>ygfTS:Cm</b>                   | ygfT-CmN   | ygfS-CmC   | pACYC184            | -                   | -          |
| 16  | aegA                              | 333-42     | 333-46     | Chromosome          | -                   | -          |
| 17  | ygfTS                             | 372-18     | 372-19     | Chromosome          | -                   | -          |
| 18  | Km-aegA                           | KmN        | 333-45     | aegA                | Km                  | -          |
| 19  | Km-ygfTS                          | KmN        | 372-17     | ygfTS               | Km                  | -          |
| 20  | <b>hydN:Tc</b>                    | hydN-CmN   | hydN-CmC   | Cm:Tc               | -                   | -          |
| 21  | <b>ygfS:Cm</b>                    | ygfS-CmC   | ygfS-CmN   | pACYC184            | -                   | -          |
| 22  | <b>fdhF:Ap</b>                    | fdhF-TcN   | fdhF-TcC   | Tc:Ap               | -                   | -          |
| 23  | <b>fdoGHI:Tc</b>                  | fdhE-TcC   | fdoG-TcN   | Tc                  | -                   | -          |
| 24  | <b>fdnGHI:Km</b>                  | fdnG-CmN   | fdnI-CmC   | Cm:Km               | -                   | -          |
| 25  | <b>fdhD:Tc</b>                    | fdhD-TcN   | fdhD-TcC   | Tc                  | -                   | -          |
| 26  | Tc                                | TcN        | TcC        | -                   | -                   | -          |
| 27  | fdhF                              | 481-7-2    | 481-8      | Chromosome          | -                   | -          |
| 28  | Tc-fdhF                           | TcN        | 481-5      | Tc                  | fdhF                | -          |
| 29  | <b>pflAB:Tc</b>                   | pflA-CmN   | pflB-CmC   | Cm:Tc               | -                   | -          |
| 30  | <b>ygeV:Cm</b>                    | ygeVN-CmN  | ygeVC-CmC  | pACYC184            | -                   | -          |
| 31  | <b>ygfT:Km</b>                    | ygfT-CmN   | ygfT-CmC   | Cm:Km               | -                   | -          |
| 32  | aegAL                             | 333-5      | 333-9      | Chromosome          | -                   | -          |
| 33  | MycHis+Cm                         | pBADN      | CmC        | pBAD/MycHisA<br>CmF | -                   | -          |
| 34  | aegAR                             | 333-10     | 333-11     | Chromosome          | -                   | -          |
| 35  | -MycHis+Cm                        | 333-5      | CmC        | aegAL               | MycHis+Cm           | -          |
| 36  | MycHis+Cm<br>-aegAR               | pBADN      | 333-11     | MycHis+Cm           | aegAR               | -          |
| 37  | <b>aegAL-MycHis+Cm<br/>-aegAR</b> | 333-7      | 333-8      | aegAL-MycHis<br>+Cm | MycHis+Cm<br>-aegAR | -          |

|    |                                 |           |           |                           |                        |                       |
|----|---------------------------------|-----------|-----------|---------------------------|------------------------|-----------------------|
| 38 | Cm+aegAR                        | CmN       | 333-11    | aegAL-MycHis<br>+Cm-aegAR | -                      | -                     |
| 39 | RaegA<br>(C68A)                 | 333-40    | 333-29    | Chromosome                | -                      | -                     |
| 40 | LaegA<br>(C68A)                 | 333-41    | 333-28-2  | Chromosome                | -                      | -                     |
| 41 | <b>aegA<br/>(C68A)+Cm</b>       | 333-41    | 333-11    | Cm+aegAR                  | RaegA<br>(C68A)        | LaegA<br>(C68A)       |
| 42 | RaegA<br>(C97A)                 | 333-40    | 333-31    | Chromosome                | -                      | -                     |
| 43 | LaegA<br>(C97A)                 | 333-41    | 333-30    | Chromosome                | -                      | -                     |
| 44 | <b>aegA<br/>(C97A)+Cm</b>       | 333-41    | 333-11    | Cm+aegAR                  | RaegA<br>(C97A)        | LaegA<br>(C97A)       |
| 45 | RaegA<br>(C121A)                | 333-40    | 333-33    | Chromosome                | -                      | -                     |
| 46 | LaegA<br>(C121A)                | 333-41    | 333-32    | Chromosome                | -                      | -                     |
| 47 | <b>aegA<br/>(C121A)+Cm</b>      | 333-41    | 333-11    | Cm+aegAR                  | RaegA<br>(C121A)       | LaegA<br>(C121A)      |
| 48 | RaegA<br>(C230A)                | 333-40    | 333-35    | Chromosome                | -                      | -                     |
| 49 | LaegA<br>(C230A)                | 333-41    | 333-34    | Chromosome                | -                      | -                     |
| 50 | <b>aegA<br/>(C230A)+Cm</b>      | 333-41    | 333-11    | Cm+aegAR                  | RaegA<br>(C230A)       | LaegA<br>(C230A)      |
| 51 | RaegA(G334<br>A G336A)          | 333-40    | 333-37    | Chromosome                | -                      | -                     |
| 52 | LaegA(G334<br>A G336A)          | 333-41    | 333-36    | Chromosome                | -                      | -                     |
| 53 | <b>aegA(G334A<br/>G336A)+Cm</b> | 333-41    | 333-11    | Cm+aegAR                  | RaegA<br>(G334A G336A) | LaegA(G334A<br>G336A) |
| 54 | RaegA<br>(G447A)                | 333-40    | 333-39    | Chromosome                | -                      | -                     |
| 55 | LaegA<br>(G447A)                | 333-41    | 333-38    | Chromosome                | -                      | -                     |
| 56 | <b>aegA(G447<br/>A)+Cm</b>      | 333-41    | 333-11    | Cm+aegAR                  | RaegA<br>(G447A)       | LaegA<br>(G447A)      |
| 57 | L-aegA                          | 334-15    | 333-15    | Chromosome                | -                      | -                     |
| 58 | pBAD-His                        | pBAD-N5   | pBAD-HisC | pBAD / His                | -                      | -                     |
| 59 | aegA                            | 333-17    | 333-8     | Chromosome                | -                      | -                     |
| 60 | pBAD-His<br>-aegA               | pBAD-HisN | 333-14    | pBAD-His                  | aegA                   | -                     |
| 61 | <b>His-aegA<br/>+Cm</b>         | 333-16    | 333-8     | L-aegA                    | pBAD-His-aegA          | Cm+aegAR              |
| 62 | Km                              | CmN-KmC   | KmN       | Km                        | -                      | -                     |

## REFERENCES

1. Papadopoulos JS, Agarwala R. 2007. COBALT: Constraint-based alignment tool for multiple protein sequences. *Bioinformatics* 23:1073–1079.

<https://doi.org/10.1093/bioinformatics/btm076>

2. Iwadate Y, Honda H, Sato H, Hashimoto M, Kato JI. 2011. Oxidative stress sensitivity of engineered *Escherichia coli* cells with a reduced genome. *FEMS Microbiol Lett* 322:25–33. <https://doi.org/10.1111/j.1574-6968.2011.02331.x>

3. Kato J, Hashimoto M. 2007. Construction of consecutive deletions of the *Escherichia coli* chromosome. *Mol Syst Biol* 3:132
